# Supplementary material for: Controllable synthesis of various kinds of copper sulfides (CuS, Cu7S4, Cu9S5) for high-performance supercapacitors
Source: Royal Society of Chemistry journal article supplement (doi:10.1039/c5dt00402k), 2015-01-01
Supplement: c5dt00402k1.pdf [file c5dt00402k1.pdf]

## Supplementary Information

# Controllable synthesis of various kinds of copper sulfides ( $\text{CuS}$ , $\text{Cu}_7\text{S}_4$ , $\text{Cu}_9\text{S}_5$ ) for high-performance supercapacitors

Ying Wang, Fuyang Liu, Ying Ji, Min Yang, Wei Liu, Wei Wang, Qiushi Sun, Ziqing

Zhang, Xudong Zhao\* and Xiaoyang Liu\*

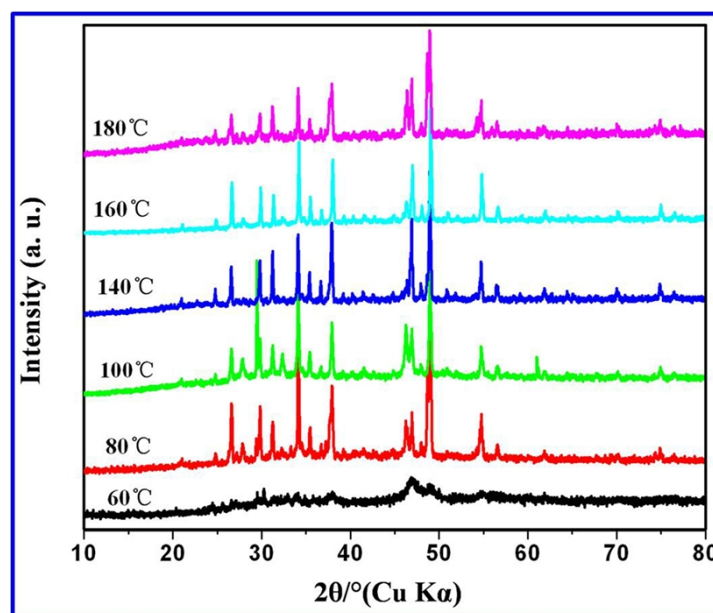

**Figure S1.** XRD patterns of the synthesized products at different temperature.

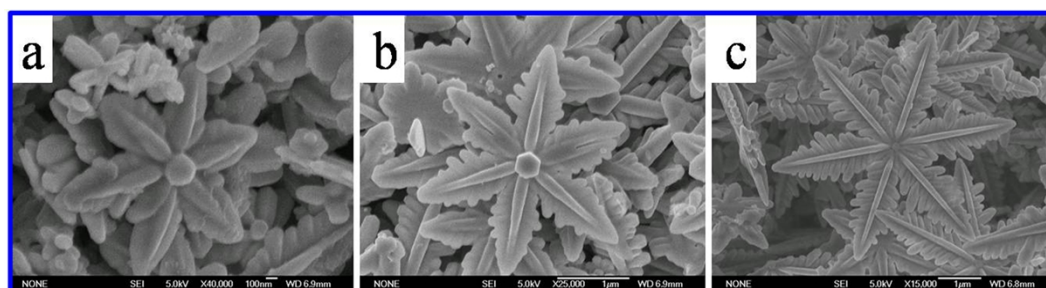

**Figure S2.** SEM images of the products obtained at different times. (a) 0.5 h, (b) 1 h, (c) 2 h.

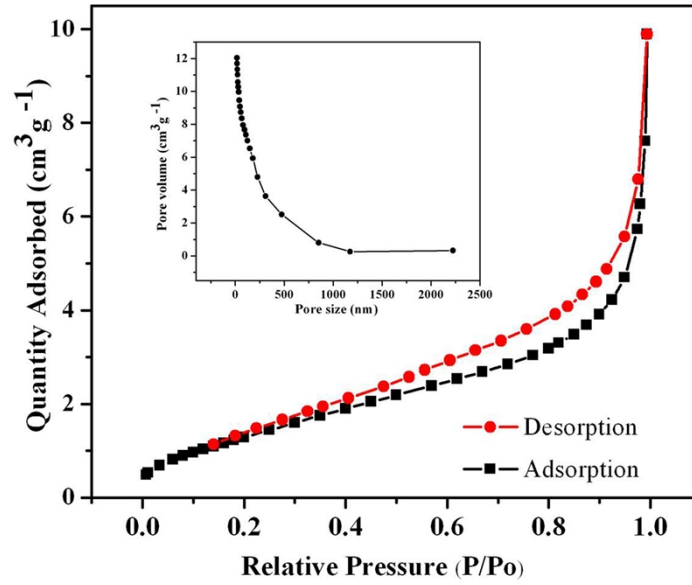

**Figure S3.** N<sub>2</sub> adsorption/desorption isotherms and BJH pore size distribution (inset) of the Cu<sub>7</sub>S<sub>4</sub>.

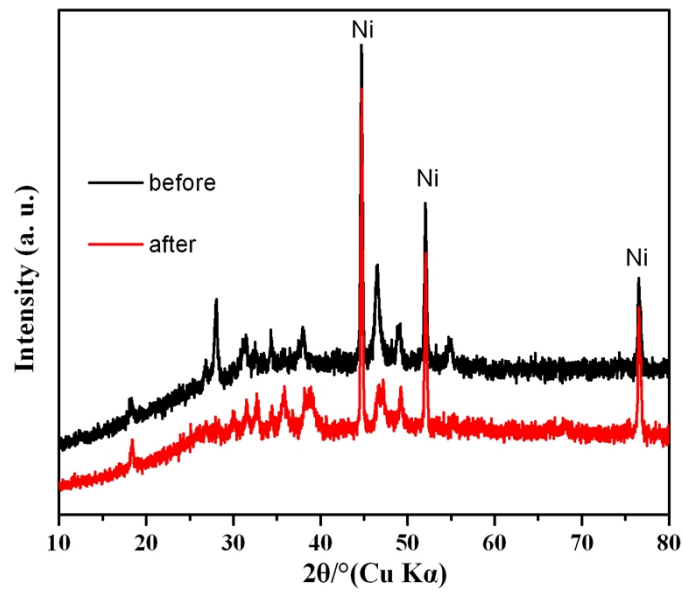

**Figure S4.** XRD patterns of the Cu<sub>7</sub>S<sub>4</sub> electrode before charge/discharge test and after 1000 cycles.

**Table S1-**The values of  $R_s$ ,  $R_{ct}$ ,  $Z_w$ ,  $C_{ps}$  and  $C_{dl}$  were calculated from the EIS result of the Cu<sub>7</sub>S<sub>4</sub>

| $R_s(\Omega)$ | $R_{ct}(\Omega)$ | $Z_w$ | $C_{ps}(F)$ | $C_{dl}(\Omega)$ |
|---------------|------------------|-------|-------------|------------------|
| 1.74          | 0.68             | 0.36  | 0.82        | 0.05             |
